# Supplementary material for: Enhancing Maize Transformation and Targeted Mutagenesis through the Assistance of Non-Integrating Wus2 Vector
Source: MDPI journal article supplement (doi:10.3390/plants12152799), 2023-07-28
Supplement: s1 [file s1]

## *Supplement Materials*

### **Enhancing Maize Transformation and Targeted Mutagenesis Through the Assistance of Non-Integrating Wus2 Vector**

**Minjeong Kang<sup>1,2,3</sup>, Keunsub Lee<sup>1,2</sup>, Qing Ji<sup>2</sup>, Sehiza Grosic<sup>2</sup>, and Kan Wang<sup>1,2\*</sup>**

<sup>1</sup>Department of Agronomy, Iowa State University, Ames, Iowa, USA

<sup>2</sup>Crop Bioengineering Center, Iowa State University, Ames, Iowa, USA

<sup>3</sup>Interdepartmental Plant Biology Major, Iowa State University, Ames, Iowa, USA

\*Author for correspondence: kanwang@iastate.edu

**Keywords:** *Wuschel2*, morphogenic transcription factor, *Agrobacterium*-mediated transformation, ternary vector system, CRISPR-Cas9, transgene-free editing

**Figure S1.** Transgene-free edited B73 plants confirmed by PCR.

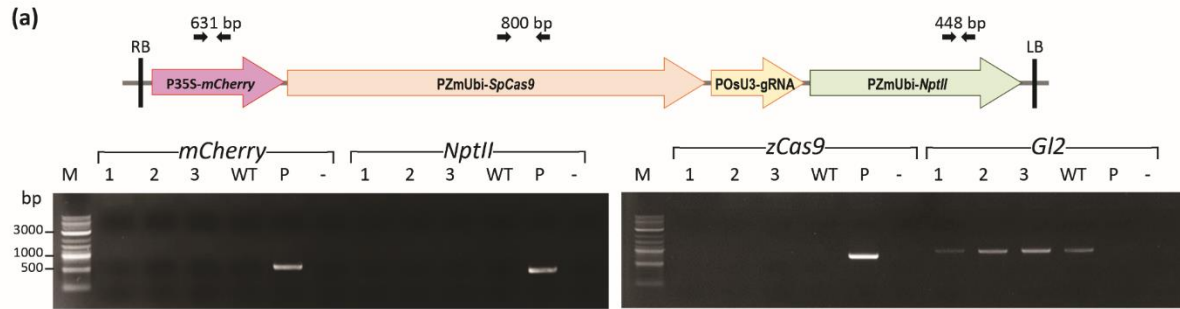

Figure S1. Transgene-free edited B73 plants confirmed by PCR. Three transgene-free edited plants (B73-R1~R3) were tested for the presence of three genes encoded on the GOI T-DNA: mCherry, NptII, and zCas9. Gl2, glossy2; WT, wildtype control; P, pKL2359 plasmid DNA as a positive control; -, water control for PCR.

**Table S1.** Summary of *Glossy2* genotyping analysis in B104.

|             | <b>Homozygous</b> | <b>Biallelic</b> | <b>Heterozygous</b> | <b>Mosaic</b> | <b>Wildtype</b> | <b>Total</b> |
|-------------|-------------------|------------------|---------------------|---------------|-----------------|--------------|
| Control     | 1 (5.3%)          | 6 (31.6%)        | 0 (0%)              | 10 (52.6%)    | 2 (10.5%)       | 19 (100%)    |
| LBA4404Thy- | 8 (22.9%)         | 13 (37.1%)       | 0 (0%)              | 8 (22.9%)     | 6 (17.1%)       | 35 (100%)    |
| EHA105Thy-  | 3 (21.4%)         | 2 (14.3%)        | 0 (0%)              | 7 (50%)       | 2 (14.3%)       | 14 (100%)    |
| EHA105TR    | 5 (19.2%)         | 10 (38.5%)       | 2 (7.7%)            | 4 (15.4%)     | 5 (19.2%)       | 26 (100%)    |

Homozygous, one mutant sequence without wild type; Biallelic, two different mutant sequences; Heterozygous, wild type sequence and one mutant sequence; Mosaic, three or more mutant sequences in a single plant sample.

LBA4404Thy-, auxotrophic LBA4404 strain with *thymidine synthase* gene (*thyA*) knock-out; EHA105Thy-, auxotrophic EHA105 strain with *thyA* knock-out; EHA105TR, *recA*-deficient auxotrophic EHA105Thy- strain.

**Table S2. List of primers used in this study**

| Primer name    | Description                                                                             | Sequence (5'-3')                           |
|----------------|-----------------------------------------------------------------------------------------|--------------------------------------------|
| ZmWUS2-F1      | PCR primer to amplify maize Wus2 and Tin2-1 terminator cassette from PHP97334 [1]       | TTTAACTTAGCCTAGGATCCCATATTCACCTCCCATGGCGG  |
| TIN2-1-R1      | PCR primer to amplify maize Wus2 and Tin2-1 terminator cassette from PHP97334 [1]       | AACTGTCGGTCCAATAGACGCCGCTCTCTCTCTCCTTGCTA  |
| 3xENH-F1       | PCR primer to amplify 3x viral enhancers and maize Ubiquitin promoter from PHP97334 [1] | AGTCGACCTGCAGGCATGCAAATCGACCGAAGCTTGCATG   |
| PZmUbi-R1      | PCR primer to amplify 3x viral enhancers and maize Ubiquitin promoter from PHP97334 [1] | GGATCCTAGGCTAAGTTAAAGTC                    |
| P35-RUBY-F1    | PCR primer to amplify the RUBY cassette from pCBL101-RUBY [2]                           | TGATTACGAATTCGAGCTCGACACTGATAGTTTTGAGACTTT |
| P35-RUBY-R1    | PCR primer to amplify the RUBY cassette from pCBL101-RUBY [2]                           | CGACTCTAGAGGATCCCCGGAAAAACAGTTTTCCCAATGCCA |
| DODA-R1        | PCR primer to amplify the RUBY cassette from pCBL101-RUBY [2]                           | CGAGATTGTAGTGGTAGGTG                       |
| DODA-F1        | PCR primer to amplify the RUBY cassette from pCBL101-RUBY [2]                           | GACGGCACCTACCACTACAA                       |
| zCas9-F        | PCR primer to check the presence of zCas9 [3]                                           | CCGATTCTGGAGAAGATGGA                       |
| zCas9-R        | PCR primer to check the presence of zCas9 [3]                                           | TCAAGAGATGGGCGTAAGT                        |
| zCas9-seq-F2   | PCR primer to check the presence of zCas9                                               | CCTGTCGGGAATCTCATTG                        |
| zCas9-seq-R2   | PCR primer to check the presence of zCas9                                               | ACTCGTACAGGAGCGAGTGC                       |
| zCas9-seq-F3   | PCR primer to check the presence of zCas9                                               | GTATGTGACCGAGGGCATGA                       |
| zCas9-seq-R3   | PCR primer to check the presence of zCas9                                               | GGGTGCTCCTTGAGGATCTG                       |
| zCas9-seq-F4   | PCR primer to check the presence of zCas9                                               | CAGCTGCAGAATGAGAAGCTC                      |
| zCas9-seq-R4   | PCR primer to check the presence of zCas9                                               | AAATCCCTGCCCTTGTC                          |
| zCas9-seq-F5   | PCR primer to check the presence of zCas9                                               | ATTCTGCCTAAGCGGAACAG                       |
| zCas9-seq-R5   | PCR primer to check the presence of zCas9                                               | GTGTGCGCAATGAACTGAT                        |
| Zm-gl2-F2      | PCR primer to amplify maize Glossy2 for genotyping analysis [3]                         | CACAGCCTTGCAATCAATTC                       |
| Zm-gl2-R2      | PCR primer to amplify maize Glossy2 for genotyping analysis [3]                         | GCTGACGTGGAAGGAGTAGC                       |
| ZmGl2-exon2-F1 | Sequencing primer for Glossy2 fragment for genotyping analysis [3]                      | ACACCGTGTCTTCGTCAAAA                       |
| Ruby_F1        | PCR primer to check the presence of RUBY from the transgenic plants                     | TTTACGACCAGCCTCAACCT                       |
| Ruby_R1        | PCR primer to check the presence of RUBY from the transgenic plants                     | GCAGGTTGATGATGTCGGAC                       |
| mCherry-F1     | PCR primer to check the presence of mCherry from the transgenic plants                  | GGGCGAGGAGGATAACATGG                       |
| mCherry-R1     | PCR primer to check the presence of mCherry from the transgenic plants                  | GGTGTAGTCCTCGTTGTGGG                       |
| mCherry-F2     | PCR primer to check the presence of mCherry from the transgenic plants                  | TTCAAGGTGCACATGGAGGG                       |
| mCherry-R2     | PCR primer to check the presence of mCherry from the transgenic plants                  | GATGTTGACGTTGTAGGCGC                       |
| NptII_F1       | PCR primer to check the presence of NptII from the transgenic plants                    | GAATGAAGTGCAGGACGAGG                       |
| NptII_R1       | PCR primer to check the presence of NptII from the transgenic plants                    | GAATCCAGAAAAGCGGCCAT                       |

[1] Wang, N., Ryan, L., Sardesai, N., Wu, E., Lenderts, B., Lowe, K., Che, P., Anand, A., Worden, A., van Dyk, D. and Barone, P., 2023. Leaf transformation for efficient random integration and targeted genome modification in maize and sorghum. *Nature Plants*, 9(2), pp.255-270.

[2] Lee, K., Kang, M., Ji, Q., Grosic, S. and Wang, K., 2023. New T-DNA binary vectors with NptII selection and RUBY reporter for efficient maize transformation and targeted mutagenesis. *Plant Physiology*, p.kiad231.

[3] Lee, K., Zhang, Y., Kleinstiver, B.P., Guo, J.A., Aryee, M.J., Miller, J., Malzahn, A., Zarecor, S., Lawrence-Dill, C.J., Joung, J.K. and Qi, Y., 2019. Activities and specificities of CRISPR/Cas9 and Cas12a nucleases for targeted mutagenesis in maize. *Plant biotechnology journal*, 17(2), pp.362-372.

**Table S3.** List of transgenic B73 plants with indel mutations.

| Plant ID | T0 genotype | Glossy2 sequence                                                          | Indel mutation | Contribution% |
|----------|-------------|---------------------------------------------------------------------------|----------------|---------------|
|          | WT          | Allele 1: TTGGTCACAGATCACAAACTTCAAATGCGGTGGGCTGGCGCTGGGGTTTCAGCT          | 0 bp           |               |
|          |             | Allele 2: TTGGTCACAGATCACAAACTTCAAATGCGGTGGGCTGGCGCTGGGGTTTCAGCT          | 0 bp           |               |
| B4-A-15  | BI          | Allele 1: TTGGTCACAGATCACAAACTTCAA <u>ATG</u> CGGTGGGCTGGCGCTGGGGTTTCAGCT | +1 bp          | 45            |
|          |             | Allele 2: TTGGTCACAGATCACAAACTTCA-----GCTGGCGCTGGGGTTTCAGCT               | -10 bp         | 41            |
| B5-A-06A | BI          | Allele 1: TTGGTCACAGATCACAAACTT---ATGCGGTGGGCTGGCGCTGGGGTTTCAGCT          | -3 bp          | 89            |
|          |             | Allele 2: TTGGTCACAGATCACAAA-----TGGCGCTGGGGTTTCAGCT                      | -17 bp         | 1             |
| B5-A-16A | HT          | Allele 1: TTGGTCACAGATCACAAACTT---ATGCGGTGGGCTGGCGCTGGGGTTTCAGCT          | -3 bp          | 64            |
|          |             | Allele 2: TTGGTCACAGATCACAAACTTCAAATGCGGTGGGCTGGCGCTGGGGTTTCAGCT          | 0 bp           | 26            |
| B4-A-11  | MO          | Allele 1: TTGGTCACAGATCACAAACTTCAAATGCGGTGGGCTGGCGCTGGGGTTTCAGCT          | 0 bp           | 12            |
|          |             | Allele 2: TTGGTCACAGATCACAAAC-----CTGGCGCTGGGGTTTCAGCT                    | -15 bp         | 7             |
|          |             | Allele 3: TTGGTCACAGATCACAAACTTCAA-----CGCTGGGGTTTCAGCT                   | -14 bp         | 7             |
| B5-A-01D | MO          | Allele 1: TTGGTCACAGATCACAAACTTCAAATGCGGTGGGCTGGCGCTGGGGTTTCAGCT          | 0 bp           | 73            |
|          |             | Allele 2: TTGGTCACAGATCACAAACTT-----GGCGCTGGGGTTTCAGCT                    | -15 bp         | 14            |
|          |             | Allele 3: TTGGTCACAGATCACAAACTTCA <u>N</u> ATGCGGTGGGCTGGCGCTGGGGTTTCAGCT | +1 bp          | 6             |
| B5-A-03A | MO          | Allele 1: TTGGTCACAGATCACAAACTTCA <u>N</u> ATGCGGTGGGCTGGCGCTGGGGTTTCAGCT | +1 bp          | 30            |
|          |             | Allele 2: TTGGTCACAGATCACAAACT-----ATGCGGTGGGCTGGCGCTGGGGTTTCAGCT         | -4 bp          | 15            |
|          |             | Allele 3: TTGGTCACAGATCACAAACTTCAA-----GGTGGGCTGGCGCTGGGGTTTCAGCT         | -4 bp          | 7             |
| B5-A-11A | MO          | Allele 1: TTGGTCACAGATCACAAACTTCAAATGCGGTGGGCTGGCGCTGGGGTTTCAGCT          | 0 bp           | 62            |
|          |             | Allele 2: TTGGTCACAGATCACAAACTTTC---TGCGGTGGGCTGGCGCTGGGGTTTCAGCT         | -3 bp          | 16            |
|          |             | Allele 3: TTGGTCACAGA-----GGTTTCAGCT                                      | -33 bp         | 10            |

WT, wild type; HT, heterozygous mutation; BI, biallelic mutation; MO, mosaic mutation showing more than 3 mutations at the target site. PAM (blue) and protospacer (red) sequences are highlighted. Inserted bases (A, N) are underlined. Contribution % represents relative proportions of indel sequence ( $p < 0.001$ ) in each sample.
